# Supplementary material for: Peer review of health research funding proposals: A systematic map and systematic review of innovations for effectiveness and efficiency
Source: PLoS One. 2018 May 11;13(5):e0196914. doi: 10.1371/journal.pone.0196914 (PMC5947897; doi:10.1371/journal.pone.0196914)
Supplement: S1 Database — (XLSX) [file pone.0196914.s004.xlsx]

## Sheet: 1. Introduction
	A systematic map and systematic review of innovations in the peer review of health research funding proposals
	Shepherd J,1,2 Frampton GK,1,2 Pickett K,1,2 Wyatt JC2
	1 Southampton Health Technology Assessments Centre (SHTAC)							2 Wessex Institute, Faculty of Medicine, University of Southampton
	Systematic map database (April 2017)
	This database presents details of 83 studies of the peer review of health research proposals which met the pre-specified eligibility criteria for inclusion in the systematic map.
	The keywords used to specify characteristics of the studies are shown in two worksheets:
	Worksheet 2 lists the studies in columns, with the keywords as row headings
	Worksheet 3 lists the studies in rows, with the keywords as column headings
	The data format is explained in the first column of worksheet 2. The majority of keywords are coded in binary (0/1), where 1 indicates that the specified
	keyword applies and 0 indicates that it does not apply; some keywords are coded as a numeric date or free text.
	Binary-coded variables maybe viewed as pivot charts or tables if desired, or selected using the drop-down menu filters in worksheet 3 to display various combinations
	of charcteristics of the evidence base.
	Worksheet 4 provides a list of the references to 89 articles which describe the 83 studies in the systematic map.
	ABBREVIATIONS USED: NA - not applicable; NR - not reported; PR - peer review

## Sheet: 2. Studies by column
Data format explanation	Mapping keywords
(NA=not applicable)
(NR=not reported)
Numeric >	Reference identity number	206	232	2182	2585	658	1124	2599	2600	2323	2329 & 2312	2315	2303	2293	85	158	2266	1119	2616 & 2615	4	2368	940	488	1274	2626	1101	92	248	1964	941	148	79	1088	2467 & 2636	839	2559	2578	2598	909	12	816	770	1142	57	2605	61 & 2450	2035	78	608
Free text >	First author	Abdoul	Abdoul	Abramo	AMRC	Andejeski	Barnett	Berg	Bielski	Bornmann	Bornmann	Bornmann	Bornmann	Bornmann	Boyack	Cabezas-Clavijo	Campbell	Carpenter	Carter	Clarke	Claveria	Das	Demicheli	Doyle	DTZ Consulting and Research	Fang	Fleurence	Fogelholm	Fonseca	Fuhrer	Gallo	Gallo	Gallo	Gilkey	Glantz	Grace	Grant	Graves	Green	Herbert	Hodgson	Hodgson	Holliday	Hume	Johnson	Kaatz	Kalberer	Kaltman	Kotchen
Free text >	Reviewer identity	KP	KP	KP	KP	KP	KP	KP	KP	KP	KP	KP	KP	KP	GF	GF	KP	KP	KP	KP	KP	KP	KP	KP	KP	KP	KP	KP	KP	KP	KP	KP	KP	GF	KP	KP	KP	KP	KP	KP	GF	KP	KP	KP	KP	KP	KP	KP	KP
Free text >	Checked by	JS	JS		JS	JS	JS	JS	JS	JS	JS									GF								GF	GF	GF					GF			GF							GF
	Publication type
0/1 >	Abstract	0	0	0	0	0	0	0	0	0	0	0	0	0	0	0	0	0	0	0	0	0	0	0	0	0	0	0	0	0	0	0	0	0	0	1	0	0	0	0	0	0	0	0	0	0	0	0	0
0/1 >	Academic journal	1	1	1	0	1	1	0	0	1	1	1	1	1	1	1	1	1	0	1	1	1	0	1	0	1	1	1	1	1	1	1	1	1	1	0	0	1	1	1	1	1	1	1	1	1	1	1	1
0/1 >	Agency report	0	0	0	1	0	0	0	1	0	0	0	0	0	0	0	0	0	1	0	0	0	0	0	1	0	0	0	0	0	0	0	0	0	0	0	1	0	0	0	0	0	0	0	0	0	0	0	0
0/1 >	Book	0	0	0	0	0	0	0	0	0	0	0	0	0	0	0	0	0	0	0	0	0	0	0	0	0	0	0	0	0	0	0	0	0	0	0	0	0	0	0	0	0	0	0	0	0	0	0	0
0/1 >	Book chapter	0	0	0	0	0	0	0	0	0	0	0	0	0	0	0	0	0	0	0	0	0	0	0	0	0	0	0	0	0	0	0	0	0	0	0	0	0	0	0	0	0	0	0	0	0	0	0	0
0/1 >	Thesis/Dissertation	0	0	0	0	0	0	0	0	0	0	0	0	0	0	0	0	0	0	0	0	0	0	0	0	0	0	0	0	0	0	0	0	1	0	0	0	0	0	0	0	0	0	0	0	0	0	0	0
0/1 >	Other	0	0	0	0	0	0	1	0	0	0	0	0	0	0	0	0	0	1	0	0	0	1	0	0	0	0	0	0	0	0	0	0	0	0	0	0	0	0	0	0	0	0	0	0	0	0	0	0
Free text / NA >	If other, state what	NA	NA	NA	NA	NA	NA	Blog article presenting research data	NA	NA	NA	NA	NA	NA	NA	NA	NA	NA	Conference paper (i.e. paper not abstract)	NA	NA	NA	Cochrane review	NA	NA	NA	NA	NA	NA	NA	NA	NA	NA	NA	NA	NA	NA	NA	NA	NA	NA	NA	NA	NA	NA	NA	NA	NA	NA
Numeric >	Publication year	2012	2012	2013	2012	2002	2015	2011	2007	2005	2005 & 2006	2006	2007	2008	2014	2013	2010	2015	1974 & 1978	2016	2000	1985	2007	2015	2006	2016	2014	2012	1994	1985	2013	2014	2016	2011, 2013	1994	2001	1997	2011	1989	2015	1995	1997	2010	2015	2008	2015	1979	2014	2004
Free text / NA >	Country 1 name	NA	France	Italy	UK	USA	Australia	USA	USA	Germany	Germany	Germany	Germany	Germany	USA	Spain	Canada	USA	USA	Australia	Spain	USA	NA	USA	UK	USA	USA	Finland	Brazil	USA	USA	USA	USA	USA	USA	USA	UK	Australia	USA	Australia	Canada	Canada	Australia	USA	USA	USA	USA	USA	USA
Free text / NA >	Country 2 name	NA	NA	NA	NA	NA	NA	NA	NA	NA	NA	NA	NA	NA	NA	NA	NA	NA	NA	NA	NA	NA	NA	NA	NA	NA	NA	NA	NA	NA	NA	NA	NA	NA	NA	NA	NA	NA	NA	NA	NA	NA	NA	NA	NA	NA	NA	NA	NA
Free text / NA >	Country 3 name	NA	NA	NA	NA	NA	NA	NA	NA	NA	NA	NA	NA	NA	NA	NA	NA	NA	NA	NA	NA	NA	NA	NA	NA	NA	NA	NA	NA	NA	NA	NA	NA	NA	NA	NA	NA	NA	NA	NA	NA	NA	NA	NA	NA	NA	NA	NA	NA
0/1 >	Multinational > 3 countries	1	0	0	0	0	0	0	0	0	0	0	0	0	0	0	0	0	0	0	0	0	1	0	0	0	0	0	0	0	0	0	0	0	0	0	0	0	0	0	0	0	0	0	0	0	0	0	0
	Setting
0/1 >	International research funder	1	0	0	0	0	0	0	0	1	1	1	1	1	0	0	0	0	0	0	0	0	0	0	0	0	0	0	0	0	0	0	0	0	0	0	0	0	0	0	0	0	0	0	0	0	0	0	0
0/1 >	National research council	1	1	1	0	1	1	1	1	0	0	0	0	0	1	1	1	1	1	1	1	1	0	1	1	1	1	1	1	1	0	0	0	1	1	1	1	1	1	1	1	1	0	0	1	1	1	1	1
0/1 >	Other funding body	1	1	0	1	0	1	0	0	0	0	0	0	0	0	0	0	0	0	0	0	0	0	0	0	0	0	0	0	0	0	0	0	0	1	0	0	0	0	0	0	1	1	1	0	0	0	0	0
0/1 >	University	0	0	0	0	0	1	0	0	0	0	0	0	0	0	0	0	0	0	0	0	0	0	0	0	0	0	0	0	0	0	0	0	0	0	0	0	0	0	0	0	0	0	0	0	0	0	0	0
0/1 >	Other	0	0	0	0	0	0	0	0	0	0	0	0	0	0	0	0	0	0	0	0	0	1	0	0	0	0	0	0	0	1	1	1	0	0	0	0	0	0	0	0	0	0	0	0	0	0	0	0
Free text / NA >	If other, state what	NA	NA	NA	NA	NA	NA	NA	NA	NA	NA	NA	NA	NA	NA	NA	NA	NA	NA	NA	NA	NA	A range of settings, as this is a systematic review of studies	NA	NA	NA	NA	NA	NA	NA	An organisation that provides peer review services to funding organisations	An organisation that provides peer review services to funding organisations	An organisation that provides peer review services to funding organisations	NA	NA	NA	NA	NA	NA	NA	NA	NA	NA	NA	NA	NA	NA	NA	NA
	Peer reviewer population
0/1 >	Academic researchers / Professional experts	1	1	1	0	1	1	0	0	0	0	0	0	0	0	0	0	1	1	1	0	0	0	0	1	0	1	0	0	0	1	0	0	0	0	0	0	0	0	1	0	0	0	0	0	0	1	0	0
0/1 >	Lay members, patients or public	0	0	0	0	1	0	0	0	0	0	0	0	0	0	0	0	1	0	0	0	0	0	0	0	0	1	0	0	0	1	0	0	1	0	0	0	0	0	0	0	0	0	0	0	0	0	0	0
0/1 >	Not reported or unclear	0	0	0	1	0	0	1	1	1	1	1	1	1	1	1	1	0	0	0	1	1	1	1	0	1	0	1	1	1	0	1	1	0	1	1	1	1	1	0	1	1	1	1	1	1	1	1	1
	Topic domain
0/1 >	Health / medical research	1	1	1	1	1	1	1	1	1	1	1	1	1	1	1	1	1	1	1	1	1	1	1	1	1	1	1	1	1	1	1	1	1	1	1	1	1	1	1	1	1	1	1	1	1	1	1	1
0/1 >	Other science/discipline	0	0	1	0	0	0	0	0	0	0	0	0	0	0	1	0	0	0	0	0	0	0	0	0	0	0	0	1	0	0	0	0	0	0	0	0	0	0	0	0	0	0	0	0	0	0	0	0
	General study type
0/1 >	Outcome evaluation	0	0	0	0	1	1	1	0	1	1	1	1	1	0	1	1	1	1	1	1	1	0	1	0	1	1	1	1	0	1	1	1	0	1	1	0	1	1	1	1	1	1	1	0	0	1	1	1
0/1 >	Process evaluation	1	1	0	0	1	0	0	0	0	0	0	0	0	0	0	0	0	0	0	0	0	0	0	0	0	1	0	0	0	1	0	0	0	0	1	0	0	1	0	0	0	1	0	0	0	0	0	0
0/1 >	Survey, interview or focus group study	0	1	0	0	0	0	0	1	0	0	0	0	0	0	0	0	0	0	0	0	0	0	0	1	0	0	0	0	1	0	0	0	1	0	0	0	0	0	0	0	0	0	0	0	0	1	0	0
0/1 >	Other	1	0	1	1	0	0	0	0	0	0	0	0	0	0	0	0	0	0	0	0	0	1	0	0	0	0	0	0	0	0	0	0	0	0	0	1	1	0	0	0	0	0	0	1	1	0	0	0
Free text / NA >	If other, state what	Review of funding agencies' assessment criteria and scoring methods	NA	Examination of registers of peer reviewers and their expertise	Audit of peer review processes at 114 medical research charities to assess whether they met the standards set by AMRC	NA	NA	NA	NA	NA	NA	NA	NA	NA	Exploratory map of PR structural relationships at NIH	NA	NA	NA	NA	NA	NA	NA	Systematic review	NA	NA	NA	NA	NA	NA	NA	NA	NA	NA	NA	NA	NA	Audit of grant applications at one research funder	Cost-effectiveness analysis	NA	NA	NA	NA	NA	NA	Modelling/simulation study	Text analysis of reviewers' critiques of applications	NA	NA	NA
	Evidence type (study design)
0/1 >	Experimental - randomised	0	0	0	0	0	0	0	0	0	0	0	0	0	0	0	0	0	0	0	0	0	0	0	0	0	0	1	0	0	0	0	0	0	0	0	0	0	1	0	0	0	0	0	0	0	0	0	0
0/1 >	Experimental - non-randomised	0	0	0	0	0	0	0	0	0	0	0	0	0	0	0	0	0	0	0	0	0	0	0	0	0	0	0	0	0	0	0	0	0	0	0	0	0	0	1	0	0	0	0	0	0	0	0	0
0/1 >	Observational study or retrospective analysis	1	1	1	0	1	1	1	0	1	1	1	1	1	0	1	1	1	1	1	1	1	0	1	0	1	1	0	1	0	1	1	1	0	1	1	0	1	0	0	1	1	1	1	0	0	1	1	1
0/1 >	Interview and/or focus group	1	1	0	0	0	0	0	0	0	0	0	0	0	0	0	0	0	0	0	0	0	0	0	0	0	1	0	0	0	0	0	0	1	0	0	0	0	0	0	0	0	0	0	0	0	1	0	0
0/1 >	Survey	0	0	0	0	1	0	0	1	0	0	0	0	0	0	0	0	0	0	0	0	0	0	0	1	0	1	0	0	1	1	0	0	1	0	0	0	0	0	0	0	0	0	0	0	0	0	0	0
0/1 >	Systematic review	0	0	0	0	0	0	0	0	0	0	0	0	0	0	0	0	0	0	0	0	0	1	0	0	0	0	0	0	0	0	0	0	0	0	0	0	0	0	0	0	0	0	0	0	0	0	0	0
0/1 >	Meta-analysis	0	0	0	0	0	0	0	0	0	0	0	0	0	0	0	0	0	0	0	0	0	0	0	0	0	0	0	0	0	0	0	0	0	0	0	0	0	0	0	0	0	0	0	0	0	0	0	0
0/1 >	Simulation study	0	0	0	0	0	0	0	0	0	0	0	0	0	0	0	0	0	0	0	0	0	0	0	0	0	0	0	0	0	0	0	0	0	0	0	0	0	0	0	0	0	0	0	1	0	0	0	0
0/1 >	Audit of grant applications/funding organisations	0	0	0	1	0	0	0	0	0	0	0	0	0	0	0	0	0	0	0	0	0	0	0	0	0	0	0	0	0	0	0	0	0	0	0	1	0	0	0	0	0	0	0	0	0	0	0	0
0/1 >	Other	1	0	0	0	0	0	0	1	0	0	0	0	0	1	0	0	0	0	0	0	0	0	0	0	0	0	0	0	0	0	0	0	0	0	1	0	1	1	0	0	0	1	0	0	1	1	0	0
Free text / NA >	If other, state what	Review of funding agencies' assessment criteria and scoring methods	NA	NA	NA	NA	NA	NA	Analysis of comments on the NIH peer review system received via a consultation exercise; and, feedback from internal and external meetings	NA	NA	NA	NA	NA	Exploratory map of PR structural relationships at NIH	NA	NA	NA	NA	NA	NA	NA	NA	NA	NA	NA	NA	NA	NA	NA	NA	NA	NA	NA	NA	Qualitative analysis of reasons for peer reviewer refusing to take on the PR task	NA	Cost-effectiveness analysis	Peer reviewers' feedback on scoring methods	NA	NA	NA	Feedback from reviewers on the peer review process	NA	NA	Text analysis of reviewers' critiques of applications	Review (non-systematic) of other similar studies	NA	NA
	PR innovations/scope of the studies
	PR system structure
0/1 >	Simplified PR	0	0	0	0	0	0	0	0	0	0	0	0	0	0	0	0	0	0	0	0	0	0	0	0	0	0	0	0	0	0	0	0	0	0	0	0	0	0	1	0	0	0	0	0	0	0	0	0
0/1 >	Accelerated PR	0	0	0	0	0	1	0	0	0	0	0	0	0	0	0	0	0	0	0	0	0	0	0	0	0	0	0	0	0	0	0	0	0	0	0	0	0	0	0	0	0	0	0	0	0	0	0	0
0/1 >	Open/blinded PR	0	0	0	0	0	0	0	0	0	0	0	0	0	0	0	0	0	0	0	0	0	1	0	0	0	0	0	0	0	0	0	0	0	0	0	0	0	0	0	0	0	0	0	0	0	0	0	0
0/1 >	Scoring/ranking approaches	0	0	0	0	0	1	0	1	0	0	0	0	0	0	0	0	0	0	0	0	0	0	0	0	0	0	0	0	0	0	0	0	0	0	0	0	0	1	0	0	0	0	0	0	0	0	0	0
0/1 >	Approaches to discussing applications	0	0	0	0	0	0	0	0	0	0	0	0	0	0	0	0	1	0	0	0	0	0	0	0	0	0	0	0	0	1	0	0	0	0	0	0	0	0	0	0	0	0	0	0	0	0	0	0
0/1 >	Reviewer configurations	0	0	0	0	0	0	0	0	0	0	0	0	0	0	0	0	0	0	0	0	0	1	0	0	0	0	0	0	0	0	0	0	0	0	0	0	0	0	0	1	0	0	0	0	0	0	0	0
0/1 >	Expert panel configurations	0	0	0	0	0	0	0	0	0	0	0	0	0	0	0	0	0	0	0	0	0	0	0	0	0	0	0	0	0	0	0	0	0	0	0	0	1	0	0	0	0	0	0	0	0	0	0	0
0/1 >	Involvement of patients and the public	0	0	0	0	1	0	0	0	0	0	0	0	0	0	0	0	0	0	0	0	0	0	0	0	0	1	0	0	0	0	0	0	1	0	0	0	0	0	0	0	0	0	0	0	0	0	0	0
0/1 >	Reviewer training	0	0	0	0	0	0	0	0	0	0	0	0	0	0	0	0	0	0	0	0	0	0	0	0	0	0	0	0	0	0	0	0	0	0	0	0	0	0	0	0	0	0	0	0	0	0	0	0
0/1 >	Incentives for peer reviewers	0	0	0	0	0	0	0	0	0	0	0	0	0	0	0	0	0	0	0	0	0	0	0	0	0	0	0	0	0	0	0	0	0	0	0	0	0	0	0	0	0	0	0	0	0	0	0	0
0/1 >	Changes to content of PR report	0	0	0	0	0	0	0	0	0	0	0	0	0	0	0	0	0	0	0	0	0	0	0	0	0	0	0	0	0	0	0	0	0	0	0	0	0	0	0	0	0	0	0	0	0	0	0	0
0/1 >	Methods to increase peer reviewer response rates	0	0	0	0	0	0	0	0	0	0	0	0	0	0	0	0	0	0	0	0	0	0	0	0	0	0	0	0	0	0	0	0	0	0	0	0	0	0	0	0	0	0	0	0	0	0	0	0
0/1 >	Solicitation and collation of reviewer feedback	0	0	0	0	0	0	0	0	0	0	0	0	0	0	0	0	0	0	0	0	0	0	0	0	0	0	0	0	0	0	0	0	0	0	0	0	0	0	0	0	0	1	0	0	0	0	0	0
0/1 >	Criteria for appraising quality of proposals	1	0	0	0	0	0	0	0	1	0	0	0	0	0	0	0	0	0	0	0	0	0	0	0	0	0	0	0	0	0	0	0	0	0	0	0	0	0	0	0	0	0	0	0	0	0	0	0
0/1 >	Identification, selection and recruitment of peer reviewers	0	0	1	1	0	0	0	0	0	0	0	0	0	0	0	0	0	0	0	0	0	0	0	0	0	0	0	0	0	0	0	0	0	1	1	0	0	0	0	0	0	0	0	0	0	0	0	0
	PR processes
0/1 >	Bias in PR	0	1	0	1	0	0	0	1	0	1	0	0	0	0	0	0	0	1	0	0	0	0	0	0	0	0	0	1	0	0	0	1	0	0	0	1	0	0	0	0	0	0	0	0	1	1	0	1
0/1 >	Quality assurance and accuracy of PR	0	0	0	1	0	0	0	0	0	0	0	0	0	0	0	0	0	0	0	0	0	0	0	0	0	0	0	0	0	0	0	0	0	0	0	0	0	0	0	0	0	0	0	0	0	0	0	0
0/1 >	Predictive ability of PR to select best applications, science and candidates	0	0	0	0	0	0	1	0	0	1	1	1	0	0	0	1	0	1	0	1	0	0	1	0	1	1	0	1	0	0	1	0	0	0	0	0	0	0	0	0	0	0	0	0	0	0	1	0
0/1 >	Consistency of reviewers and PR methods	1	0	0	0	0	0	0	1	0	1	0	0	1	0	0	0	0	1	1	0	1	0	0	0	0	1	1	0	0	0	0	0	0	0	0	0	1	0	0	0	1	0	0	0	0	0	0	0
0/1 >	Stakeholders' opinions	1	1	0	0	1	1	1	1	0	0	0	0	0	0	0	0	0	0	0	0	0	0	0	1	0	1	0	0	1	1	0	0	1	0	0	0	0	1	0	0	0	1	0	0	0	1	0	0
	Other
0/1 >	Other	1	0	0	1	0	0	0	1	0	0	0	0	0	1	0	0	0	0	0	0	0	1	0	1	0	0	0	0	0	0	0	0	0	0	0	0	0	0	0	0	0	0	1	1	0	0	0	0
Free text / NA >	If other, state what		NA	NA	Accountability and transparency of funders' PR processes; length of term reviewers serve on panels; use of internal and external reviewers	NA	NA	NA	Feedback to applicants, PR effect on innovation	NA	NA	NA	NA	NA	Exploratory map of PR structural relationships at NIH	NA	NA	NA	NA	NA	NA	NA	Methods of screening applications, ways of eliciting reviewers' opinions and ways of presenting feedback to applicants	NA	Costs of university staff being peer reviewers, and time spent on different aspects of peer review (both by reviewers and funding agencies)	NA	NA	NA	NA	NA	NA	NA	NA	NA	NA	NA	NA	NA	NA	NA	NA	NA	NA	An examination of how reviewers' comments were associated with changes in the application score and whether or not the application was funded.	Evaluation of model that can adjust the scores allocated to grant applications for the uncertainty (i.e. variability between reviewers' rankings	NA	NA	NA	NA
	Specific PR issues investigated
0/1 >	Number of reviewers	0	0	0	0	0	0	0	0	0	0	0	0	0	0	0	0	0	0	0	0	0	0	0	0	0	0	0	0	0	0	0	0	0	0	0	0	1	0	1	0	0	0	0	0	0	0	0	0
0/1 >	Expertise of reviewers	1	0	1	1	0	0	0	1	0	0	0	0	0	0	0	0	0	0	0	0	0	0	0	0	0	0	0	0	0	0	0	0	1	1	0	0	0	0	0	0	0	0	0	0	0	0	0	0
0/1 >	Level of proposal detail	0	0	0	0	0	1	0	1	0	0	0	0	0	0	0	0	0	0	0	0	0	0	0	0	0	0	0	0	0	0	0	0	0	0	0	0	0	0	1	0	0	0	0	0	0	0	0	0
0/1 >	With/without panel discussion	0	0	0	0	0	0	0	0	0	0	0	0	0	0	0	0	0	0	0	0	0	0	0	0	0	1	0	0	0	0	0	0	0	0	0	0	0	0	1	1	0	0	0	0	0	0	0	0
0/1 >	Not reported	0	0	0	0	0	0	0	0	0	0	0	0	0	0	0	0	0	0	0	0	0	0	0	0	0	0	0	0	0	0	0	0	0	0	0	0	0	0	0	0	0	0	0	0	0	0	0	0
0/1 >	Other	0	0	0	0	0	0	0	0	0	0	0	0	0	1	0	0	0	0	0	0	0	0	0	0	0	0	0	0	0	0	0	0	0	0	0	0	0	0	0	0	0	0	0	0	0	0	0	0
Free text / NA >	If other, state what	NA	NA	NA	NA	NA	NA	NA	NA	NA	NA	NA	NA	NA	Exploration of overall system organisation of PR at NIH	NA	NA	NA	NA	NA	NA	NA	NA	NA	NA	NA	NA	NA	NA	NA	NA	NA	NA	NA	NA	NA	NA	NA	NA	NA	NA	NA	NA	NA	NA	NA	NA	NA	NA
	Outcome and process measures
	Reliability, validity and quality of PR
0/1 >	Reviewer / panel agreement	1	0	0	0	1	0	0	0	0	1	0	0	1	0	0	0	1	1	1	0	1	0	0	0	0	1	1	0	0	1	0	0	0	0	0	0	1	0	0	1	1	0	0	0	0	0	0	0
0/1 >	Funding decision/PR score agreement between different PR methods	0	0	0	0	0	0	0	0	0	0	0	0	0	0	0	0	1	0	0	0	0	0	0	0	0	0	0	0	0	0	0	0	0	0	0	0	0	0	1	0	0	0	0	0	0	0	0	0
0/1 >	Validity of selection decisions	0	0	0	0	0	0	1	0	0	0	1	1	0	0	0	1	0	0	0	0	0	0	0	0	0	1	0	1	0	0	0	0	0	0	0	0	0	0	0	0	0	0	0	0	0	0	0	0
0/1 >	Other quality/reliability measure of PR	0	0	0	1	0	0	0	0	0	0	0	0	0	0	0	0	0	0	0	0	0	0	0	0	0	0	0	0	0	0	0	0	0	0	0	0	0	0	0	0	0	0	0	0	0	0	0	0
0/1 >	Quality of the peer review report	1	0	0	0	0	0	0	0	0	0	0	0	0	0	0	0	0	0	0	0	0	0	0	0	0	0	0	0	0	0	0	0	0	0	0	0	0	0	0	0	0	0	0	0	0	0	0	0
	PR effect on research quality and innovation
0/1 >	Association of peer review with research impact	0	0	0	0	0	0	1	0	0	1	0	0	0	0	1	1	0	1	0	1	0	0	1	0	1	0	0	0	0	0	1	0	0	0	0	0	0	0	0	0	0	0	0	0	0	0	1	0
0/1 >	PR effect on research quality	0	0	0	0	0	0	0	0	0	0	0	0	0	0	0	0	0	0	0	0	0	1	0	0	0	0	0	0	0	0	0	0	0	0	0	0	0	0	0	0	0	0	0	0	0	0	0	0
0/1 >	PR effect on innovation	0	0	0	0	0	0	0	0	0	0	0	0	0	0	0	0	0	0	0	1	0	0	0	0	0	0	0	1	0	0	0	0	0	0	0	0	0	0	0	0	0	0	0	0	0	0	0	0
	Efficiency
0/1 >	Reviewers' acceptance rates of the PR task	0	0	0	0	0	0	0	0	0	0	0	0	0	0	0	0	0	0	0	0	0	0	0	0	0	0	0	0	0	0	0	0	0	0	1	0	0	0	0	0	0	0	0	0	0	0	0	0
0/1 >	Time taken for PR	1	0	0	0	0	1	0	0	0	0	0	0	0	0	0	0	1	0	0	0	0	0	0	1	0	0	0	0	0	1	0	0	0	0	0	0	0	0	1	0	0	0	0	0	0	0	0	0
0/1 >	Time to funding decision	0	0	0	0	0	1	0	0	0	0	0	0	0	0	0	0	0	0	0	0	0	0	0	0	0	0	0	0	0	0	0	0	0	0	0	0	0	0	0	0	0	0	0	0	0	0	0	0
0/1 >	Costs / cost savings / cost-effectiveness	0	0	0	0	0	0	0	0	0	0	0	0	0	0	0	0	0	0	0	0	0	0	0	1	0	0	0	0	0	0	0	0	0	0	0	0	1	0	1	0	0	0	0	1	0	0	0	0
0/1 >	Peer reviewer response rates	0	0	0	0	0	0	0	0	0	0	0	0	0	0	0	0	0	0	0	0	0	0	0	0	0	0	0	0	0	0	0	0	0	0	0	0	0	0	0	0	0	0	0	0	0	0	0	0
	Funding/reviewer decisions
0/1 >	Funding probability/success/rates	0	0	0	0	0	1	0	0	1	1	0	0	0	0	0	0	1	0	0	0	0	0	0	0	0	0	0	0	0	0	0	0	0	0	0	1	1	0	0	0	0	0	1	1	0	0	0	1
0/1 >	Grant application scores	0	0	0	0	0	0	0	0	0	0	0	0	0	0	0	0	1	1	0	0	1	0	0	0	0	0	0	0	0	1	0	0	0	0	0	0	0	1	0	1	0	1	1	0	0	0	0	1
	Stakeholders' views on the PR system and reviewer practices
0/1 >	Applicants' views/opinions	0	1	0	0	0	1	1	1	0	0	0	0	0	0	0	0	0	0	0	0	0	0	0	0	0	0	0	0	1	0	0	0	0	0	0	0	0	0	0	0	0	0	0	0	0	1	0	0
0/1 >	Panel members' views/opinions	1	1	0	0	0	0	1	0	0	0	0	0	0	0	0	0	0	0	0	0	0	0	0	0	0	0	0	0	0	0	0	0	0	0	0	0	0	0	0	0	0	0	0	0	0	0	0	0
0/1 >	Peer reviewers' views/opinions	1	1	0	0	1	0	0	1	0	0	0	0	0	0	0	0	0	0	0	0	0	0	0	1	0	1	0	0	1	1	0	0	0	0	0	0	0	1	0	0	0	1	0	0	0	0	0	0
0/1 >	Research council members' views/opinions	0	0	0	0	0	0	1	1	0	0	0	0	0	0	0	0	0	0	0	0	0	0	0	0	0	0	0	0	0	1	0	0	0	0	0	0	0	0	0	0	0	0	0	0	0	0	0	0
0/1 >	Patients' or public's views/opinions	0	0	0	0	1	0	0	1	0	0	0	0	0	0	0	0	0	0	0	0	0	0	0	0	0	1	0	0	0	0	0	0	1	0	0	0	0	0	0	0	0	0	0	0	0	0	0	0
0/1 >	Other stakeholders' views/opinions	0	0	0	0	0	0	0	1	0	0	0	0	0	0	0	0	0	0	0	0	0	0	0	0	0	0	0	0	0	0	0	0	1	0	0	0	0	0	0	0	0	0	0	0	0	0	0	0
0/1 >	Facilitators and/or barriers	0	0	0	0	0	0	0	0	0	0	0	0	0	0	0	0	0	0	0	0	0	0	0	0	0	0	0	0	0	0	0	0	1	0	0	0	0	0	0	0	0	0	0	0	0	0	0	0
0/1 >	Reviewer practices	1	0	0	0	0	0	0	0	0	0	0	0	0	0	0	0	0	0	0	0	0	0	0	0	0	0	0	0	0	0	0	0	1	0	0	0	0	0	0	0	0	0	0	0	0	0	0	0
	Fairness
0/1 >	Bias/fairness - gender	0	0	0	0	0	0	0	0	0	1	0	0	0	0	0	0	0	0	0	0	0	0	0	0	0	0	0	0	0	0	0	0	0	0	0	1	0	0	0	0	0	0	0	0	1	0	0	0
0/1 >	Bias/fairness - ethnicity	0	0	0	0	0	0	0	0	0	1	0	0	0	0	0	0	0	0	0	0	0	0	0	0	0	0	0	0	0	0	0	0	0	0	0	0	0	0	0	0	0	0	0	0	0	0	0	0
0/1 >	Bias/fairness - conflicts	0	1	0	1	0	0	0	0	0	0	0	0	0	0	0	0	0	0	0	0	0	0	0	0	0	0	0	1	0	0	0	1	0	0	0	0	0	0	0	0	0	0	0	0	0	0	0	0
0/1 >	Bias/fairness - other	0	0	0	0	0	0	0	0	0	1	0	0	0	0	0	0	0	1	0	0	0	0	0	0	0	0	0	0	0	0	0	0	0	0	0	0	0	0	0	0	0	0	0	0	1	0	0	1
	Other
0/1 >	Other	0	0	1	1	0	1	0	0	0	0	0	0	0	1	0	0	0	0	0	0	0	0	0	0	0	0	0	0	0	1	0	0	0	1	1	0	0	0	0	0	1	0	0	0	0	0	1	0
Free text / NA >	If other, state what	NA	NA	Number and percentage of reviewers classed as experts in their field, and scientific activity of the peer reviewers	Expertise of reviewers, accountability and transparency of research funders' PR processes, how peer reviewers are selected, length of term reviewers serve on panels, use of internal and external reviewers	NA	Time spent preparing proposals	NA	NA	NA	NA	NA	NA	NA	Graphical map of PR at NIH	NA	NA	NA	NA	NA	NA	NA	NA	NA	NA	NA	NA	NA	NA	NA	Impact on reviewer recruitment (in terms of changes in the recruitment of reviewers with the appropriate level of expertise)	NA	NA	NA	Reviewer expertise, as measured by the number of publications they had in the funding topic area	Factors associated with peer reviewers refusing to take on the PR task, and reasons for refusal	NA	NA	NA	NA	NA	Examination of applicant factors that might affect the level of scoring/funding agreement of the same proposal between two funding agencies	NA	NA	NA	NA	NA	The association between the number of prior publications an investigator has and the citation impact of their grants	NA
Free text >	Notes
[truncated: 33 more columns]

## Sheet: 3. Studies by row
Identification		Publication type and date									Location				Setting						Peer reviewer population			Topic domain		General study type					Evidence type (study design)											Peer review system structure
Reference identity number	Study first author	Abstract	Academic journal	Agency report	Book	Book chapter	Thesis or disser-tation	Other	If other, state what	Publi-cation year	Country 1 name	Country 2 name	Country 3 name	Multi-national > 3 countries	Inter-national research funder	National research council	Other funding body	Uni-versity	Other	If other, state what	Academic researchers or profess-ional experts	Lay members, patients or public	Not reported or unclear	Health or medical research	Other science or discipline	Outcome evaluation	Process evaluation	Survey, interview or focus group study	Other	If other, state what	Experi-mental: random-ised	Experi-mental: non-random-ised	Observation-al study or retrospective analysis	Interview and/or focus group	Survey	System-atic review	Meta-analysis	Simulation study	Audit of grant applications or funding organisations	Other	If other, state what	Simpli-fied PR	Acceler-ated PR	Open or blinded PR	Scoring or ranking approaches	Approaches to discussing applications	Reviewer configur-ations	Expert panel configur-ations	Involvement of patients and the public
206	Abdoul	0	1	0	0	0	0	0	NA	2012	NA	NA	NA	1	1	1	1	0	0	NA	1	0	0	1	0	0	1	0	1	Review of funding agencies' assessment criteria and scoring methods	0	0	1	1	0	0	0	0	0	1	Review of funding agencies' assessment criteria and scoring methods	0	0	0	0	0	0	0	0
232	Abdoul	0	1	0	0	0	0	0	NA	2012	France	NA	NA	0	0	1	1	0	0	NA	1	0	0	1	0	0	1	1	0	NA	0	0	1	1	0	0	0	0	0	0	NA	0	0	0	0	0	0	0	0
2182	Abramo	0	1	0	0	0	0	0	NA	2013	Italy	NA	NA	0	0	1	0	0	0	NA	1	0	0	1	1	0	0	0	1	Examination of registers of peer reviewers and their expertise	0	0	1	0	0	0	0	0	0	0	NA	0	0	0	0	0	0	0	0
2585	AMRC	0	0	1	0	0	0	0	NA	2012	UK	NA	NA	0	0	0	1	0	0	NA	0	0	1	1	0	0	0	0	1	Audit of peer review processes at 114 medical research charities to assess whether they met the standards set by AMRC	0	0	0	0	0	0	0	0	1	0	NA	0	0	0	0	0	0	0	0
658	Andejeski	0	1	0	0	0	0	0	NA	2002	USA	NA	NA	0	0	1	0	0	0	NA	1	1	0	1	0	1	1	0	0	NA	0	0	1	0	1	0	0	0	0	0	NA	0	0	0	0	0	0	0	1
1124	Barnett	0	1	0	0	0	0	0	NA	2015	Australia	NA	NA	0	0	1	1	1	0	NA	1	0	0	1	0	1	0	0	0	NA	0	0	1	0	0	0	0	0	0	0	NA	0	1	0	1	0	0	0	0
2599	Berg	0	0	0	0	0	0	1	Blog article presenting research data	2011	USA	NA	NA	0	0	1	0	0	0	NA	0	0	1	1	0	1	0	0	0	NA	0	0	1	0	0	0	0	0	0	0	NA	0	0	0	0	0	0	0	0
2600	Bielski	0	0	1	0	0	0	0	NA	2007	USA	NA	NA	0	0	1	0	0	0	NA	0	0	1	1	0	0	0	1	0	NA	0	0	0	0	1	0	0	0	0	1	Analysis of comments on the NIH peer review system received via a consultation exercise; and, feedback from internal and external meetings	0	0	0	1	0	0	0	0
2323	Bornmann	0	1	0	0	0	0	0	NA	2005	Germany	NA	NA	0	1	0	0	0	0	NA	0	0	1	1	0	1	0	0	0	NA	0	0	1	0	0	0	0	0	0	0	NA	0	0	0	0	0	0	0	0
2329 & 2312	Bornmann	0	1	0	0	0	0	0	NA	2005 & 2006	Germany	NA	NA	0	1	0	0	0	0	NA	0	0	1	1	0	1	0	0	0	NA	0	0	1	0	0	0	0	0	0	0	NA	0	0	0	0	0	0	0	0
2315	Bornmann	0	1	0	0	0	0	0	NA	2006	Germany	NA	NA	0	1	0	0	0	0	NA	0	0	1	1	0	1	0	0	0	NA	0	0	1	0	0	0	0	0	0	0	NA	0	0	0	0	0	0	0	0
2303	Bornmann	0	1	0	0	0	0	0	NA	2007	Germany	NA	NA	0	1	0	0	0	0	NA	0	0	1	1	0	1	0	0	0	NA	0	0	1	0	0	0	0	0	0	0	NA	0	0	0	0	0	0	0	0
2293	Bornmann	0	1	0	0	0	0	0	NA	2008	Germany	NA	NA	0	1	0	0	0	0	NA	0	0	1	1	0	1	0	0	0	NA	0	0	1	0	0	0	0	0	0	0	NA	0	0	0	0	0	0	0	0
85	Boyack	0	1	0	0	0	0	0	NA	2014	USA	NA	NA	0	0	1	0	0	0	NA	0	0	1	1	0	0	0	0	0	Exploratory map of PR structural relationships at NIH	0	0	0	0	0	0	0	0	0	1	Exploratory map of PR structural relationships at NIH	0	0	0	0	0	0	0	0
158	Cabezas-Clavijo	0	1	0	0	0	0	0	NA	2013	Spain	NA	NA	0	0	1	0	0	0	NA	0	0	1	1	1	1	0	0	0	NA	0	0	1	0	0	0	0	0	0	0	NA	0	0	0	0	0	0	0	0
2266	Campbell	0	1	0	0	0	0	0	NA	2010	Canada	NA	NA	0	0	1	0	0	0	NA	0	0	1	1	0	1	0	0	0	NA	0	0	1	0	0	0	0	0	0	0	NA	0	0	0	0	0	0	0	0
1119	Carpenter	0	1	0	0	0	0	0	NA	2015	USA	NA	NA	0	0	1	0	0	0	NA	1	1	0	1	0	1	0	0	0	NA	0	0	1	0	0	0	0	0	0	0	NA	0	0	0	0	1	0	0	0
2616 & 2615	Carter	0	0	1	0	0	0	1	Conference paper (i.e. paper not abstract)	1974 & 1978	USA	NA	NA	0	0	1	0	0	0	NA	1	0	0	1	0	1	0	0	0	NA	0	0	1	0	0	0	0	0	0	0	NA	0	0	0	0	0	0	0	0
4	Clarke	0	1	0	0	0	0	0	NA	2016	Australia	NA	NA	0	0	1	0	0	0	NA	1	0	0	1	0	1	0	0	0	NA	0	0	1	0	0	0	0	0	0	0	NA	0	0	0	0	0	0	0	0
2368	Claveria	0	1	0	0	0	0	0	NA	2000	Spain	NA	NA	0	0	1	0	0	0	NA	0	0	1	1	0	1	0	0	0	NA	0	0	1	0	0	0	0	0	0	0	NA	0	0	0	0	0	0	0	0
940	Das	0	1	0	0	0	0	0	NA	1985	USA	NA	NA	0	0	1	0	0	0	NA	0	0	1	1	0	1	0	0	0	NA	0	0	1	0	0	0	0	0	0	0	NA	0	0	0	0	0	0	0	0
488	Demicheli	0	0	0	0	0	0	1	Cochrane review	2007	NA	NA	NA	1	0	0	0	0	1	A range of settings, as this is a systematic review of studies	0	0	1	1	0	0	0	0	1	Systematic review	0	0	0	0	0	1	0	0	0	0	NA	0	0	1	0	0	1	0	0
1274	Doyle	0	1	0	0	0	0	0	NA	2015	USA	NA	NA	0	0	1	0	0	0	NA	0	0	1	1	0	1	0	0	0	NA	0	0	1	0	0	0	0	0	0	0	NA	0	0	0	0	0	0	0	0
2626	DTZ Consulting and Research	0	0	1	0	0	0	0	NA	2006	UK	NA	NA	0	0	1	0	0	0	NA	1	0	0	1	0	0	0	1	0	NA	0	0	0	0	1	0	0	0	0	0	NA	0	0	0	0	0	0	0	0
1101	Fang	0	1	0	0	0	0	0	NA	2016	USA	NA	NA	0	0	1	0	0	0	NA	0	0	1	1	0	1	0	0	0	NA	0	0	1	0	0	0	0	0	0	0	NA	0	0	0	0	0	0	0	0
92	Fleurence	0	1	0	0	0	0	0	NA	2014	USA	NA	NA	0	0	1	0	0	0	NA	1	1	0	1	0	1	1	0	0	NA	0	0	1	1	1	0	0	0	0	0	NA	0	0	0	0	0	0	0	1
248	Fogelholm	0	1	0	0	0	0	0	NA	2012	Finland	NA	NA	0	0	1	0	0	0	NA	0	0	1	1	0	1	0	0	0	NA	1	0	0	0	0	0	0	0	0	0	NA	0	0	0	0	0	0	0	0
1964	Fonseca	0	1	0	0	0	0	0	NA	1994	Brazil	NA	NA	0	0	1	0	0	0	NA	0	0	1	1	1	1	0	0	0	NA	0	0	1	0	0	0	0	0	0	0	NA	0	0	0	0	0	0	0	0
941	Fuhrer	0	1	0	0	0	0	0	NA	1985	USA	NA	NA	0	0	1	0	0	0	NA	0	0	1	1	0	0	0	1	0	NA	0	0	0	0	1	0	0	0	0	0	NA	0	0	0	0	0	0	0	0
148	Gallo	0	1	0	0	0	0	0	NA	2013	USA	NA	NA	0	0	0	0	0	1	An organisation that provides peer review services to funding organisations	1	1	0	1	0	1	1	0	0	NA	0	0	1	0	1	0	0	0	0	0	NA	0	0	0	0	1	0	0	0
79	Gallo	0	1	0	0	0	0	0	NA	2014	USA	NA	NA	0	0	0	0	0	1	An organisation that provides peer review services to funding organisations	0	0	1	1	0	1	0	0	0	NA	0	0	1	0	0	0	0	0	0	0	NA	0	0	0	0	0	0	0	0
1088	Gallo	0	1	0	0	0	0	0	NA	2016	USA	NA	NA	0	0	0	0	0	1	An organisation that provides peer review services to funding organisations	0	0	1	1	0	1	0	0	0	NA	0	0	1	0	0	0	0	0	0	0	NA	0	0	0	0	0	0	0	0
2467 & 2636	Gilkey	0	1	0	0	0	1	0	NA	2011, 2013	USA	NA	NA	0	0	1	0	0	0	NA	0	1	0	1	0	0	0	1	0	NA	0	0	0	1	1	0	0	0	0	0	NA	0	0	0	0	0	0	0	1
839	Glantz	0	1	0	0	0	0	0	NA	1994	USA	NA	NA	0	0	1	1	0	0	NA	0	0	1	1	0	1	0	0	0	NA	0	0	1	0	0	0	0	0	0	0	NA	0	0	0	0	0	0	0	0
2559	Grace	1	0	0	0	0	0	0	NA	2001	USA	NA	NA	0	0	1	0	0	0	NA	0	0	1	1	0	1	1	0	0	NA	0	0	1	0	0	0	0	0	0	1	Qualitative analysis of reasons for peer reviewer refusing to take on the PR task	0	0	0	0	0	0	0	0
2578	Grant	0	0	1	0	0	0	0	NA	1997	UK	NA	NA	0	0	1	0	0	0	NA	0	0	1	1	0	0	0	0	1	Audit of grant applications at one research funder	0	0	0	0	0	0	0	0	1	0	NA	0	0	0	0	0	0	0	0
2598	Graves	0	1	0	0	0	0	0	NA	2011	Australia	NA	NA	0	0	1	0	0	0	NA	0	0	1	1	0	1	0	0	1	Cost-effectiveness analysis	0	0	1	0	0	0	0	0	0	1	Cost-effectiveness analysis	0	0	0	0	0	0	1	0
909	Green	0	1	0	0	0	0	0	NA	1989	USA	NA	NA	0	0	1	0	0	0	NA	0	0	1	1	0	1	1	0	0	NA	1	0	0	0	0	0	0	0	0	1	Peer reviewers' feedback on scoring methods	0	0	0	1	0	0	0	0
12	Herbert	0	1	0	0	0	0	0	NA	2015	Australia	NA	NA	0	0	1	0	0	0	NA	1	0	0	1	0	1	0	0	0	NA	0	1	0	0	0	0	0	0	0	0	NA	1	0	0	0	0	0	0	0
816	Hodgson	0	1	0	0	0	0	0	NA	1995	Canada	NA	NA	0	0	1	0	0	0	NA	0	0	1	1	0	1	0	0	0	NA	0	0	1	0	0	0	0	0	0	0	NA	0	0	0	0	0	1	0	0
770	Hodgson	0	1	0	0	0	0	0	NA	1997	Canada	NA	NA	0	0	1	1	0	0	NA	0	0	1	1	0	1	0	0	0	NA	0	0	1	0	0	0	0	0	0	0	NA	0	0	0	0	0	0	0	0
1142	Holliday	0	1	0	0	0	0	0	NA	2010	Australia	NA	NA	0	0	0	1	0	0	NA	1	0	0	1	0	1	1	0	0	NA	0	0	1	0	0	0	0	0	0	1	Feedback from reviewers on the peer review process	0	0	0	0	0	0	0	0
57	Hume	0	1	0	0	0	0	0	NA	2015	USA	NA	NA	0	0	0	1	0	0	NA	0	0	1	1	0	1	0	0	0	NA	0	0	1	0	0	0	0	0	0	0	NA	0	0	0	0	0	0	0	0
2605	Johnson	0	1	0	0	0	0	0	NA	2008	USA	NA	NA	0	0	1	0	0	0	NA	0	0	1	1	0	0	0	0	1	Modelling/simulation study	0	0	0	0	0	0	0	1	0	0	NA	0	0	0	0	0	0	0	0
61 & 2450	Kaatz	0	1	0	0	0	0	0	NA	2015	USA	NA	NA	0	0	1	0	0	0	NA	0	0	1	1	0	0	0	0	1	Text analysis of reviewers' critiques of applications	0	0	0	0	0	0	0	0	0	1	Text analysis of reviewers' critiques of applications	0	0	0	0	0	0	0	0
2035	Kalberer	0	1	0	0	0	0	0	NA	1979	USA	NA	NA	0	0	1	0	0	0	NA	1	0	1	1	0	1	0	1	0	NA	0	0	1	1	0	0	0	0	0	1	Review (non-systematic) of other similar studies	0	0	0	0	0	0	0	0
78	Kaltman	0	1	0	0	0	0	0	NA	2014	USA	NA	NA	0	0	1	0	0	0	NA	0	0	1	1	0	1	0	0	0	NA	0	0	1	0	0	0	0	0	0	0	NA	0	0	0	0	0	0	0	0
608	Kotchen	0	1	0	0	0	0	0	NA	2004	USA	NA	NA	0	0	1	0	0	0	NA	0	0	1	1	0	1	0	0	0	NA	0	0	1	0	0	0	0	0	0	0	NA	0	0	0	0	0	0	0	0
542	Kotchen	0	1	0	0	0	0	0	NA	2006	USA	NA	NA	0	0	1	0	0	0	NA	0	0	1	1	0	1	0	0	0	NA	0	0	1	0	0	0	0	0	0	0	NA	0	0	0	0	0	0	1	0
2350	Langfeldt	0	1	0	0	0	0	0	NA	2001	Norway	NA	NA	0	0	1	0	0	0	NA	0	0	1	1	1	0	1	0	0	NA	0	0	0	1	0	0	0	0	0	1	Observation of panel meetings and study of applications and review documents	0	0	0	1	0	0	1	0
44	Lauer	0	1	0	0	0	0	0	NA	2015	USA	NA	NA	0	0	1	0	0	0	NA	0	0	1	1	0	1	0	0	0	NA	0	0	1	0	0	0	0	0	0	0	NA	0	0	0	0	0	0	0	0
48	Li	0	1	0	0	0	0	0	NA	2015	USA	NA	NA	0	0	1	0	0	0	NA	0	0	1	1	0	1	0	0	0	NA	0	0	1	0	0	0	0	0	0	0	NA	0	0	0	0	0	0	0	0
20	Lindner	0	1	0	0	0	0	0	NA	2015	USA	NA	NA	0	0	1	0	0	0	NA	0	0	1	1	0	1	0	0	0	NA	0	0	1	0	0	0	0	0	0	0	NA	0	0	0	0	0	0	0	0
187	Lobb	0	1	0	0	0	0	0	NA	2013	Canada	NA	NA	0	0	1	0	0	0	NA	1	0	0	1	0	1	0	0	0	NA	0	0	1	0	0	0	0	0	0	0	NA	0	0	0	0	0	0	1	0
303	Martin	0	1	0	0	0	0	0	NA	2010	USA	NA	NA	0	0	1	0	0	0	NA	1	1	0	1	0	1	0	0	0	NA	0	0	1	0	0	0	0	0	0	0	NA	0	0	0	0	0	0	0	0
431	Martin	0	1	0	0	0	0	0	NA	2008	USA	NA	NA	0	0	1	0	0	0	NA	0	0	1	1	0	1	0	0	0	NA	0	0	1	0	0	0	0	0	0	0	NA	0	0	0	0	0	0	0	0
518	Mayo	0	1	0	0	0	0	0	NA	2006	Canada	NA	NA	0	0	0	0	1	0	NA	1	0	0	1	0	1	0	0	0	NA	0	1	0	0	0	0	0	0	0	0	NA	0	0	0	1	0	1	1	0
2580	Monahan	0	1	0	0	0	0	0	NA	2003	Canada	NA	NA	0	0	1	0	0	0	NA	1	1	0	1	0	0	0	1	0	NA	0	0	0	0	1	0	0	0	0	0	NA	0	0	0	0	0	0	0	1
1196	Mow	0	0	0	0	0	1	0	NA	2009	Australia	NA	NA	0	0	1	0	0	0	NA	0	0	1	1	0	0	0	0	1	Comparative case study (comparing processes at two different research funders)	0	0	0	1	1	0	0	0	0	1	Observation of meetings, and examination of publications about the research councils included in the study	0	0	0	0	0	0	0	0
200	Mutz	0	1	0	0	0	0	0	NA	2012	Austria	NA	NA	0	0	1	0	0	0	NA	0	0	1	1	1	1	0	0	0	NA	0	0	1	0	0	0	0	0	0	0	NA	0	0	0	0	0	0	0	0
2603	NIH	0	0	1	0	0	0	0	NA	2010	USA	NA	NA	0	0	1	0	0	0	NA	0	0	1	1	0	0	1	0	0	NA	0	0	0	0	1	0	0	0	0	0	NA	0	0	0	1	0	0	0	0
2602	NIH	0	0	1	0	0	0	0	NA	2013	USA	NA	NA	0	0	1	0	0	0	NA	0	0	1	1	0	0	1	0	0	NA	0	0	0	0	1	0	0	0	0	0	NA	1	0	0	1	0	0	0	0
819	Olsson	0	1	0	0	0	0	0	NA	1995	USA	NA	NA	0	0	1	0	0	0	NA	0	0	1	1	0	0	0	0	1	Retrospective analysis	0	0	1	0	0	0	0	0	0	0	NA	0	0	0	0	0	1	0	0
1543	Quaglio	0	1	0	0	0	0	0	NA	2011	NA	NA	NA	1	1	0	0	0	0	NA	1	0	0	1	0	0	0	0	1	Retrospective analysis	0	0	1	0	0	0	0	0	0	0	NA	0	0	0	0	0	0	0	0
136	Ramos	0	1	0	0	0	0	0	NA	2013	USA	NA	NA	0	0	0	1	0	0	NA	1	1	0	1	0	0	0	1	0	NA	0	0	0	0	1	0	0	0	0	0	NA	0	0	0	0	0	1	0	1
654	Rangel	0	1	0	0	0	0	0	NA	2002	USA	NA	NA	0	0	1	0	0	0	NA	1	0	0	1	0	1	0	0	0	NA	0	0	1	0	0	0	0	0	0	0	NA	0	0	0	0	0	1	0	0
2621, 2622 & 2627	RCUK	0	0	1	0	0	0	0	NA	2006, 2007 & undated (2014 online)	UK	NA	NA	0	0	1	0	0	0	NA	1	0	0	1	1	0	0	1	1	Benchmarking study to identify alternative methods of PR and to identify best practice; consulation with stakeholders	0	0	0	0	1	0	0	0	0	1	Calculation of PR costs at each Research Council in the UK; Benchmarking study to identify alternative methods of PR and to identify best practice; consultation with stakeholders about new PR processes that could be implemented at research councils and invitation of comments on the recommendations for peer review contained in the 'Warry' report	0	0	0	0	0	0	0	0
2272	Reinhart	0	1	0	0	0	0	0	NA	2009	Switzerland	NA	NA	0	0	1	0	0	0	NA	1	0	0	1	1	1	0	0	0	NA	0	0	1	0	0	0	0	0	0	0	NA	0	0	0	0	0	0	0	0
950	Russell	0	1	0	0	0	0	0	NA	1983	Canada	NA	NA	0	0	0	1	0	0	NA	0	0	1	1	0	1	0	0	0	NA	0	0	1	0	0	0	0	0	0	0	NA	1	0	0	0	0	1	0	0
3	Sattler	0	1	0	0	0	0	0	NA	2015	USA	NA	NA	0	0	0	0	1	0	NA	1	0	0	1	0	1	0	0	0	NA	1	0	0	0	0	0	0	0	0	0	NA	0	0	0	0	0	0	0	0
307	Schroter	0	1	0	0	0	0	0	NA	2010	NA	NA	NA	1	0	0	0	0	1	Survey of a range of biomedical research funders across different countries	1	0	0	1	0	0	0	1	0	NA	0	0	0	0	1	0	0	0	0	0	NA	0	0	1	0	0	0	0	0
38	Snell	0	1	0	0	0	0	0	NA	2015	Canada	NA	NA	0	0	0	0	0	1	Academic research study based on a Canadian Institues for Health postdoc fellowship competition	0	0	1	1	0	0	0	0	1	Statistical modelling predictive study	0	0	0	0	0	0	0	1	0	0	NA	0	0	0	0	0	1	0	0
474 & 1147	Street	0	1	0	0	0	0	0	NA	2007 & 2009	Australia	NA	NA	0	0	0	1	0	0	NA	0	0	1	1	0	0	0	1	0	NA	0	0	0	1	0	0	0	0	0	0	NA	0	0	0	0	0	0	0	0
2555	Taylor	1	0	0	0	0	0	0	NA	2001	Canada	NA	NA	0	0	0	1	0	0	NA	0	0	1	1	0	1	0	0	0	NA	0	0	1	0	0	0	0	0	0	0	NA	0	0	0	0	0	0	0	0
849	Vener	0	1	0	0	0	0	0	NA	1993	USA	NA	NA	0	0	1	0	0	0	NA	0	0	1	1	0	0	0	0	1	Statistical modelling predictive study	0	0	0	0	0	0	0	1	0	0	NA	0	0	0	0	0	1	0	0
31	Vo	0	1	0	0	0	0	0	NA	2015	USA	NA	NA	0	0	1	0	0	0	NA	0	0	1	1	0	1	0	1	0	NA	0	0	0	1	0	0	0	0	0	0	NA	0	0	0	0	1	0	0	0
2101	Wang	0	1	0	0	0	0	0	NA	2015	Sweden	NA	NA	0	0	1	0	0	0	NA	1	0	0	1	0	0	0	0	1	Characterisation of cognitive distance between applicants and reviewers	0	0	1	0	0	0	0	0	0	0	NA	0	0	0	0	0	0	0	0
2567	Wessely	0	0	0	0	1	0	0	NA	1999 & 2008	Not reported	NA	NA	0	0	1	1	0	0	NA	0	0	1	1	0	0	0	0	1	Review, described as SR but limited methods given	0	0	0	0	0	1	0	0	0	0	NA	1	0	1	1	0	1	0	0
511	Whaley	0	1	0	0	0	0	0	NA	2006	USA	NA	NA	0	0	0	1	0	0	NA	1	0	0	1	0	1	0	0	0	NA	0	1	0	0	0	0	0	0	0	0	NA	0	0	0	1	0	0	0	0
985	Wiener	0	1	0	0	0	0	0	NA	1997	USA	NA	NA	0	0	1	0	0	0	NA	1	0	0	1	0	1	0	0	0	NA	0	0	1	0	1	0	0	0	0	0	NA	0	0	0	1	0	0	0	0
817	Wisely	0	1	0	0	0	0	0	NA	1995	UK	NA	NA	0	0	1	0	0	0	NA	0	0	NR	1	0	0	0	1	0	NA	0	0	0	0	1	0	0	0	0	0	NA	0	0	0	0	0	0	0	0
[truncated: 50 more columns]

## Sheet: 4. Reference list
Grey shading indicates references which refer to the same study
Study (identified by first author)	Reference identity number	Reference citation	URL/DOI
Abdoul	206	Abdoul H, Perrey C, Amiel P, Tubach F, Gottot S, Durand-Zaleski I, et al. Peer review of grant applications: criteria used and qualitative study of reviewer practices. PLoS ONE. 2012;7(9):e46054	http://dx.doi.org/10.1371/journal.pone.0046054
Abdoul	232	Abdoul H, Perrey C, Tubach F, Amiel P, Durand-Zaleski I, Alberti C. Non-financial conflicts of interest in academic grant evaluation: a qualitative study of multiple stakeholders in France. PLoS ONE. 2012;7(4):e35247	http://dx.doi.org/10.1371/journal.pone.0035247
Abramo	2182	Abramo G, D'Angelo CA, Viel F. Selecting competent referees to assess research projects proposals: A study of referees' registers. Research Evaluation. 2013;22(1):41-51	http://dx.doi.org/10.1093/reseval/rvs031
AMRC	2585	AMRC (Association of Medical Research Charities). A house in good order: a report on the AMRC peer review audit 2011. London, UK: 2012	http://www.amrc.org.uk/sites/default/files/doc_lib/A%20house%20in%20good%20order_A%20report%20on%20the%20AMRC%20peer%20review%20audit%202011.pdf
Andejeski	658	Andejeski Y, Bisceglio IT, Dickersin K, Johnson JE, Robinson SI, Smith HS, et al. Quantitative impact of including consumers in the scientific review of breast cancer research proposals. J Womens Health Gend Based Med. 2002;11(4):379-88	http://ovidsp.ovid.com/ovidweb.cgi?T=JS&CSC=Y&NEWS=N&PAGE=fulltext&D=med4&AN=12150500
Barnett	1124	Barnett AG, Herbert DL, Campbell M, Daly N, Roberts JA, Mudge A, et al. Streamlined research funding using short proposals and accelerated peer review: an observational study. BMC Health Serv Res. 2015;15:55	http://dx.doi.org/10.1186/s12913-015-0721-7
Berg	2599	Berg J. NIGMS Feedback Loop Blog [Internet]. USA: National Institute of General Medical Sciences. 2011. [cited 2016]	https://loop.nigms.nih.gov/category/peer-review/page/3/
Bielski	2600	Bielski A, Harris R, Gillis N. Summary report of comments received on NIH system to support biomedical and behavioral research and peer review. Bethesda, MD, USA: 2007	http://enhancing-peer-review.nih.gov/docs/Peer_Review_Report_2007_12_03v3.pdf
Bornmann	2323	Bornmann L, Daniel HD. Criteria used by a peer review committee for selection of research fellows - A boolean probit analysis. Int J Sel Assess. 2005;13(4):296-303	http://dx.doi.org/10.1111/j.1468-2389.2005.00326.x
Bornmann	2329	Bornmann L, Daniel HD. Selection of research fellowship recipients by committee peer review. Reliability, fairness and predictive validity of Board of Trustees' decisions. Scientometrics. 2005;63(2):297-320	http://dx.doi.org/10.1007/s11192-005-0214-2
	2312	Bornmann L, Daniel HD. Potential sources of bias in research fellowship assessments: effects of university prestige and field of study. Research Evaluation. 2006;15(3):209-19	http://dx.doi.org/10.3152/147154406781775850
Bornmann	2315	Bornmann L, Daniel HD. Selecting scientific excellence through committee peer review - A citation analysis of publications previously published to approval or rejection of post-doctoral research fellowship applicants. Scientometrics. 2006;68(3):427-40	http://dx.doi.org/10.1007/s11192-006-0121-1
Bornmann	2303	Bornmann L, Mutz R, Daniel HD. Row-column (RC) association model applied to grant peer review. Scientometrics. 2007;73(2):139-47	http://dx.doi.org/10.1007/s11192-006-1797-y
Bornmann	2293	Bornmann L, Mutz R, Daniel HD. Latent Markov modeling applied to grant peer review. J Informetr. 2008;2(3):217-28	http://dx.doi.org/10.1016/j.joi.2008.05.003
Boyack	85	Boyack KW, Chen MC, Chacko G. Characterization of the peer review network at the Center for Scientific Review, National Institutes of Health. PLoS ONE. 2014;9(8):e104244	http://dx.doi.org/10.1371/journal.pone.0104244
Cabezas-Clavijo	158	Cabezas-Clavijo A, Robinson-Garcia N, Escabias M, Jimenez-Contreras E. Reviewers' ratings and bibliometric indicators: hand in hand when assessing over research proposals? PLoS ONE. 2013;8(6):e68258	http://dx.doi.org/10.1371/journal.pone.0068258
Campbell	2266	Campbell D, Picard-Aitken M, Cote G, Caruso J, Valentim R, Edmonds S, et al. Bibliometrics as a Performance Measurement Tool for Research Evaluation: The Case of Research Funded by the National Cancer Institute of Canada. Am J Eval. 2010;31(1):66-83	http://dx.doi.org/10.1177/1098214009354774
Carpenter	1119	Carpenter AS, Sullivan JH, Deshmukh A, Glisson SR, Gallo SA. A retrospective analysis of the effect of discussion in teleconference and face-to-face scientific peer-review panels. BMJ Open. 2015;5(9):e009138	http://dx.doi.org/10.1136/bmjopen-2015-009138
Carter	2616	Carter G. Peer review, citations, and biomedical research policy: NIH grants to medical school faculty. Santa Monica, CA, USA: 1974.	http://www.rand.org/content/dam/rand/pubs/reports/2008/R1583.pdf
	2615	Carter G. A citation study of the NIH peer review process. 1978.	http://www.rand.org/pubs/papers/P6085.html
Clarke	4	Clarke P, Herbert D, Graves N, Barnett AG. A randomized trial of fellowships for early career researchers finds a high reliability in funding decisions. J Clin Epidemiol. 2016;69:147-51	http://dx.doi.org/10.1016/j.jclinepi.2015.04.010
Claveria	2368	Claveria LE, Guallar E, Cami J, Conde J, Pastor R, Ricoy JR, et al. Does peer review predict the performance of research projects in health sciences? Scientometrics. 2000;47(1):11-23	http://dx.doi.org/10.1023/a:1005609624130
Das	940	Das NK, Froehlich LA. Quantitative evaluation of peer review of program project and center applications in allergy and immunology. J Clin Immunol. 1985;5(4):220-7	http://ovidsp.ovid.com/ovidweb.cgi?T=JS&CSC=Y&NEWS=N&PAGE=fulltext&D=med2&AN=4044784
Demicheli	488	Demicheli V, Di Pietrantonj C. Peer review for improving the quality of grant applications. Cochrane Database Syst Rev. 2007;(2):MR000003	http://dx.doi.org/10.1002/14651858.MR000003.pub2
Doyle	1274	Doyle JM, Quinn K, Bodenstein YA, Wu CO, Danthi N, Lauer MS. Association of percentile ranking with citation impact and productivity in a large cohort of de novo NIMH-funded R01 grants. Molecular Psychiatry. 2015;20(9):1030-6	https://www.nature.com/mp/journal/v20/n9/full/mp201571a.html
DTZ Consulting and Research	2626	DTZ Consulting & Research (for RCUK). Analysis of the external costs of peer review. Swindon, UK: 2006.	http://www.rcuk.ac.uk/documents/documents/prdtz-pdf/
Fang	1101	Fang FC, Bowen A, Casadevall A. NIH peer review percentile scores are poorly predictive of grant productivity. eLife. 2016;5:e13323	http://dx.doi.org/10.7554/eLife.13323
Fleurence	92	Fleurence RL, Forsythe LP, Lauer M, Rotter J, Ioannidis JP, Beal A, et al. Engaging patients and stakeholders in research proposal review: the patient-centered outcomes research institute. Ann Intern Med. 2014;161(2):122-30	http://dx.doi.org/10.7326/M13-2412
Fogelholm	248	Fogelholm M, Leppinen S, Auvinen A, Raitanen J, Nuutinen A, Vaananen K. Panel discussion does not improve reliability of peer review for medical research grant proposals. J Clin Epidemiol. 2012;65(1):47-52	http://dx.doi.org/10.1016/j.jclinepi.2011.05.001
Fonseca	1964	Fonseca L, Rangel V, Lustosa P, Lannes D, Aguiar LC, Flavoni L, et al. Productivity versus promised results: one of the dilemmas of biotechnology in Brazil. Brazilian journal of medical and biological research = Revista brasileira de pesquisas medicas e biologicas / Sociedade Brasileira de Biofisica 1994;27(12):2709-20
Fuhrer	941	Fuhrer MJ, Grabois M. Grant application and review procedures of the National Institute of Handicapped Research: survey of applicant and peer reviewer opinions. Arch Phys Med Rehabil. 1985;66(5):318-21	http://ovidsp.ovid.com/ovidweb.cgi?T=JS&CSC=Y&NEWS=N&PAGE=fulltext&D=med2&AN=3159374
Gallo	148	Gallo SA, Carpenter AS, Glisson SR. Teleconference versus face-to-face scientific peer review of grant application: effects on review outcomes. PLoS ONE. 2013;8(8):e71693	http://dx.doi.org/10.1371/journal.pone.0071693
Gallo	79	Gallo SA, Carpenter AS, Irwin D, McPartland CD, Travis J, Reynders S, et al. The validation of peer review through research impact measures and the implications for funding strategies. PLoS ONE. 2014;9(9):e106474	http://dx.doi.org/10.1371/journal.pone.0106474
Gallo	1088	Gallo SA, Lemaster M, Glisson SR. Frequency and Type of Conflicts of Interest in the Peer Review of Basic Biomedical Research Funding Applications: Self-Reporting Versus Manual Detection. Sci Eng Ethics. 2016;22(1):189-97	http://dx.doi.org/10.1007/s11948-015-9631-7
Gilkey	2467	Gilkey MB. Consumer advocates in the peer review of cancer-related research: Experience, representation, and the lived body. US: ProQuest Information & Learning; 2012	http://search.ebscohost.com/login.aspx?direct=true&db=psyh&AN=2012-99200-556&site=ehost-live
	2636	Gilkey MB. Supporting cancer survivors' participation in peer review: perspectives from NCI's CARRA program. Journal of Cancer Survivorship: Research and Practice. 2014;8(1):114-20	http://dx.doi.org/10.1007/s11764-013-0318-2
Glantz	839	Glantz SA, Bero LA. Inappropriate and appropriate selection of 'peers' in grant review. JAMA. 1994;272(2):114-6	http://jama.jamanetwork.com/article.aspx?articleid=376142
Grace	2559	Grace WC, Levitin T, Cole S. Characteristics of successfully recruited grant application peer reviewers [abstract]. 4th International Congress on Peer Review in Biomedical Publication, September 14-16, 2001, Barcelona, Spain. 2001	http://onlinelibrary.wiley.com/o/cochrane/clcmr/articles/CMR-4040/frame.html
Grant	2578	Grant J, Low L. Women and peer review An audit of the Wellcome Trust's decision-making on grants London, UK: 1997	https://wellcome.ac.uk/sites/default/files/wtd003212_0.pdf
Graves	2598	Graves N, Barnett AG, Clarke P. Funding grant proposals for scientific research: retrospective analysis of scores by members of grant review panel. BMJ. 2011;343:d4797	http://dx.doi.org/10.1136/bmj.d4797
Green	909	Green JG, Calhoun F, Nierzwicki L, Brackett J, Meier P. Rating intervals: an experiment in peer review. Faseb J. 1989;3(8):1987-92	http://www.fasebj.org/content/3/8/1987.full.pdf
Herbert	12	Herbert DL, Graves N, Clarke P, Barnett AG. Using simplified peer review processes to fund research: a prospective study. BMJ Open. 2015;5(7):e008380	http://dx.doi.org/10.1136/bmjopen-2015-008380
Hodgson	816	Hodgson C. Evaluation of cardiovascular grant-in-aid applications by peer review: influence of internal and external reviewers and committees. Can J Cardiol. 1995;11(10):864-8	http://ovidsp.ovid.com/ovidweb.cgi?T=JS&CSC=Y&NEWS=N&PAGE=fulltext&D=med3&AN=7489524
Hodgson	770	Hodgson C. How reliable is peer review? An examination of operating grant proposals simultaneously submitted to two similar peer review systems. J Clin Epidemiol. 1997;50(11):1189-95	http://ovidsp.ovid.com/ovidweb.cgi?T=JS&CSC=Y&NEWS=N&PAGE=fulltext&D=med4&AN=9393374
Holliday	1142	Holliday C, Robotin M. The Delphi process: a solution for reviewing novel grant applications. Int J Gen Med. 2010;3:225-30
Hume	57	Hume KM, Giladi AM, Chung KC. Factors impacting successfully competing for research funding: an analysis of applications submitted to the Plastic Surgery Foundation. Plast Reconstr Surg. 2015;135(2):429e-35e	http://dx.doi.org/10.1097/PRS.0000000000000904
Johnson	2605	Johnson V. Statistical analysis of the National Institutes of Health peer review system. PNAS. 2008;105(32):11076-80	http://www.pnas.org/content/105/32/11076.full.pdf
Kaatz	61	Kaatz A, Magua W, Zimmerman DR, Carnes M. A quantitative linguistic analysis of National Institutes of Health R01 application critiques from investigators at one institution. Acad Med. 2015;90(1):69-75	http://dx.doi.org/10.1097/ACM.0000000000000442
	2450	Kaatz AC. Quantitative text analysis of R01 grant reviews from the National Institutes of Health (NIH). US: ProQuest Information & Learning; 2013	http://search.ebscohost.com/login.aspx?direct=true&db=psyh&AN=2013-99161-039&site=ehost-live
Kalberer	2035	Kalberer Jr JT. Treatment of young investigators in the National Cancer Program. J Natl Cancer Inst. 1979;63(4):1097-103	https://doi.org/10.1093/jnci/63.4.1097
Kaltman	78	Kaltman JR, Evans FJ, Danthi NS, Wu CO, DiMichele DM, Lauer MS. Prior publication productivity, grant percentile ranking, and topic-normalized citation impact of NHLBI cardiovascular R01 grants. Circ Res. 2014;115(7):617-24	http://dx.doi.org/10.1161/CIRCRESAHA.115.304766
Kotchen	608	Kotchen TA, Lindquist T, Malik K, Ehrenfeld E. NIH peer review of grant applications for clinical research. JAMA. 2004;291(7):836-43	http://dx.doi.org/10.1001/jama.291.7.836
Kotchen	542	Kotchen TA, Lindquist T, Miller Sostek A, Hoffmann R, Malik K, Stanfield B. Outcomes of National Institutes of Health peer review of clinical grant applications. J Investig Med. 2006;54(1):13-9	http://jim.bmj.com/content/54/1/13.long
Langfeldt	2350	Langfeldt L. The decision-making constraints and processes of grant peer review, and their effects on the review outcome. Soc Stud Sci. 2001;31(6):820-41	http://dx.doi.org/10.1177/030631201031006002
Lauer	44	Lauer MS, Danthi NS, Kaltman J, Wu C. Predicting Productivity Returns on Investment: Thirty Years of Peer Review, Grant Funding, and Publication of Highly Cited Papers at the National Heart, Lung, and Blood Institute. Circ Res. 2015;117(3):239-43	http://dx.doi.org/10.1161/CIRCRESAHA.115.306830
Li	48	Li D, Agha L. Research funding. Big names or big ideas: do peer-review panels select the best science proposals? Science. 2015;348(6233):434-8	http://dx.doi.org/10.1126/science.aaa0185
Lindner	20	Lindner MD, Nakamura RK. Examining the Predictive Validity of NIH Peer Review Scores.[Erratum appears in PLoS One. 2015;10(6):e0132202	http://dx.doi.org/10.1371/journal.pone.0126938
Lobb	187	Lobb R, Petermann L, Manafo E, Keen D, Kerner J. Networking and knowledge exchange to promote the formation of transdisciplinary coalitions and levels of agreement among transdisciplinary peer reviewers. J Public Health Manag Pract. 2013;19(1):E9-20	http://dx.doi.org/10.1097/PHH.0b013e31823991c2
Martin	303	Martin MR, Kopstein A, Janice JM. An analysis of preliminary and post-discussion priority scores for grant applications peer reviewed by the Center for Scientific Review at the NIH. PLoS ONE. 2010;5(11):e13526	http://dx.doi.org/10.1371/journal.pone.0013526
Martin	431	Martin MR, Lindquist T, Kotchen TA. Why are peer review outcomes less favorable for clinical science than for basic science grant applications? Am J Med. 2008;121(7):637-41	http://dx.doi.org/10.1016/j.amjmed.2008.03.031
Mayo	518	Mayo NE, Brophy J, Goldberg MS, Klein MB, Miller S, Platt RW, et al. Peering at peer review revealed high degree of chance associated with funding of grant applications. J Clin Epidemiol. 2006;59(8):842-8	https://doi.org/10.1016/j.jclinepi.2005.12.007
Monahan	2580	Monahan A, Stewart D. The role of lay panelists on grant review panels. Chronic Dis Can. 2003;24(2-3):70-4	http://www.collectionscanada.gc.ca/webarchives/20071124141008/http://www.phac-aspc.gc.ca/publicat/cdic-mcc/24-2/d_e.html
Mow	1196	Mow KE. Research Grant Funding and Peer Review in Australian Research Councils. University of Canberra. Administrative Studies, 2009	http://www.canberra.edu.au/researchrepository/items/2a04fa15-5591-0a4d-ebe1-f49467310292/1/
Mutz	200	Mutz R, Bornmann L, Daniel HD. Heterogeneity of inter-rater reliabilities of grant peer reviews and its determinants: a general estimating equations approach. PLoS ONE. 2012;7(10):e48509	http://dx.doi.org/10.1371/journal.pone.0048509
NIH	2603	NIH (National Institutes of Health). Enhancing peer review. Survey results report (2010). Bethesda, MD, USA: 2010	http://enhancing-peer-review.nih.gov/docs/Enhancing_Peer_Review_Report.pdf
NIH	2602	NIH (National Institutes of Health). Enhancing peer review. Survey results report (2013). Bethesda, MD, USA: 2013	http://enhancing-peer-review.nih.gov/docs/Enhancing_Peer_Review_Report_2012.pdf
Olsson	819	Olsson CA, Kennedy WA, 2nd. Urology peer review at the National Institutes of Health. J Urol. 1995;154(5):1866-9
Quaglio	1543	Quaglio G, Guardabasso V, Olesen OF, Draghia-Akli R. The selection of experts evaluating health projects for the EU Sixth Framework Program. Journal of Public Health. 2011;19(5):445-52	http://dx.doi.org/10.1007/s10389-011-0395-5
Ramos	136	Ramos MA, Fox A, Simon EP, Horowitz CR. A community-academic partnership to address racial/ethnic health disparities through grant-making. Public Health Rep. 2013;128 Suppl 3:61-7	http://www.ncbi.nlm.nih.gov/pmc/articles/PMC3945451/pdf/phr128s60061.pdf
Rangel	654	Rangel SJ, Efron B, Moss RL. Recent trends in National Institutes of Health funding of surgical research. Ann Surg. 2002;236(3):277-86; discussion 86-7	http://www.ncbi.nlm.nih.gov/pmc/articles/PMC1422581/pdf/20020900s00004p277.pdf
RCUK	2621	RCUK (Research Councils UK). Report of the Research Councils UK Efficiency and Effectiveness of Peer Review project. Swindon, UK: 2006	http://www.rcuk.ac.uk/documents/documents/rcukprreport-pdf/
	2622	RCUK (Research Councils UK). RCUK Response to the project report & consultation on the efficiency and effectiveness of peer review. Swindon, UK: 2007	http://www.rcuk.ac.uk/documents/documents/responsereport-pdf/
	2627	RCUK (Research Councils UK). Summary of the analysis of the responses received to the RCUK efficiency and effectiveness of peer review consultation. Swindon, UK: undated (2014 online).	http://www.rcuk.ac.uk/documents/documents/analysisresponsepeer-pdf/
Reinhart	2272	Reinhart M. Peer review of grant applications in biology and medicine. Reliability, fairness, and validity. Scientometrics. 2009;81(3):789-809	http://dx.doi.org/10.1007/s11192-008-2220-7
Russell	950	Russell AS, Thorn BD, Grace M. Peer review: a simplified approach. J Rheumatol. 1983;10(3):479-81	http://ovidsp.ovid.com/ovidweb.cgi?T=JS&CSC=Y&NEWS=N&PAGE=fulltext&D=med2&AN=6887172
Sattler	3	Sattler DN, McKnight PE, Naney L, Mathis R. Grant Peer Review: Improving Inter-Rater Reliability with Training. PLoS ONE. 2015;10(6):e0130450	http://dx.doi.org/10.1371/journal.pone.0130450
Schroter	307	Schroter S, Groves T, Hojgaard L. Surveys of current status in biomedical science grant review: funding organisations' and grant reviewers' perspectives. BMC Med. 2010;8:62	http://dx.doi.org/10.1186/1741-7015-8-62
Snell	38	Snell RR. Menage a quoi? Optimal number of peer reviewers. PLoS ONE. 2015;10(4):e0120838	http://dx.doi.org/10.1371/journal.pone.0120838
Street	474	Street J, Baum F, Anderson I. Developing a collaborative research system for Aboriginal health. Aust N Z J Public Health. 2007;31(4):372-8	https://doi.org/10.1111/j.1753-6405.2007.00090.x
	1147	Street J, Baum F, Anderson IP. Is peer review useful in assessing research proposals in Indigenous health? A case study. Health Res Policy Syst. 2009;7:2	http://dx.doi.org/10.1186/1478-4505-7-2
Taylor	2555	Taylor M. Of molecules, mice, and men: The relationship of biological complexity of research model to final rating in the grant peer review process of the Heart and Stroke Foundation of Canada [abstract]. 4th International Congress on Peer Review in Biomedical Publication, September 14-16, 2001, Barcelona, Spain. 2001	http://onlinelibrary.wiley.com/o/cochrane/clcmr/articles/CMR-4073/frame.html
Vener	849	Vener KJ, Feuer EJ, Gorelic L. A statistical model validating triage for the peer review process: keeping the competitive applications in the review pipeline. Faseb J. 1993;7(14):1312-9	http://www.fasebj.org/content/7/14/1312.full.pdf
Vo	31	Vo NM, Trocki R. Virtual and Peer Reviews of Grant Applications at the Agency for Healthcare Research and Quality. South Med J. 2015;108(10):622-6	https://www.ncbi.nlm.nih.gov/labs/articles/26437196/
Wang	2101	Wang Q, Sandstrom U. Defining the role of cognitive distance in the peer review process with an explorative study of a grant scheme in infection biology. Research Evaluation. 2015;24(3):271-81	http://dx.doi.org/10.1093/reseval/rvv009
Wessely	2567	Wessely S, Wood FQ. Chapter 2: Peer review of grant applications: a systematic review. In: Godlee F, Jefferson T, editors. Peer review in health sciences. London BMJ Books; 1999. p. 14-31 (Second edition 2003 also checked)	http://eu.wiley.com/WileyCDA/WileyTitle/productCd-0727916858.html
Whaley	511	Whaley AL. An objective rating form to evaluate grant proposals to the Hogg Foundation for Mental Health: a pilot study of implementation. Eval Rev. 2006;30(6):803-16	http://erx.sagepub.com/content/30/6/803.full.pdf
Wiener	985	Wiener SL, Urivetzky M, Bregman D, Cohen J, Eich R, Gootman N, et al. Peer review: inter-reviewer agreement during evaluation of research grant applications. Clin Res. 1977;25(5):306-11
Wisely	817	Wisely J, Haines A. Commissioning a national programme of research and development on the interface between primary and secondary care. BMJ. 1995;311(7012):1080-2	http://www.ncbi.nlm.nih.gov/pmc/articles/PMC2551375/pdf/bmj00615-0051.pdf
